# Supplementary material for: Anti-Inflammatory Effect of Protopine through MAPK and NF-κB Signaling Regulation in HepG2 Cell
Source: MDPI journal article supplement (doi:10.3390/molecules27144601), 2022-07-19
Supplement: s1 [file s1]

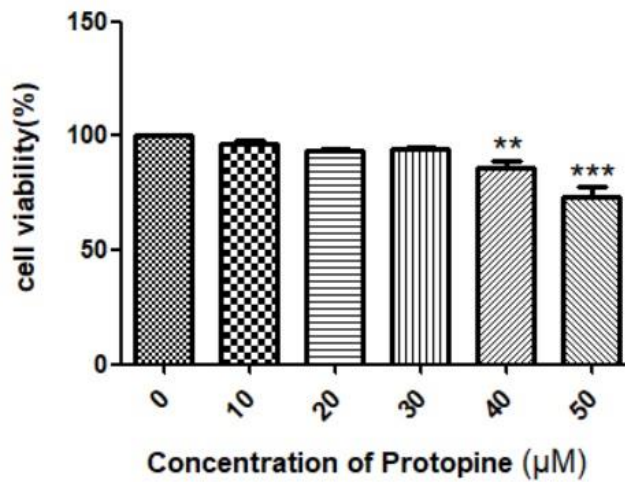

**Figure S1. Effect of protopine on HepG2 cell viability.** Cell viability of protopine on HepG2 cells. HepG2 cells were incubated for 24 h with various concentrations 0-50μM protopine. Results are expressed in percentage of non-treated control. Data are expressed as the mean  $\pm$  SD of three times experiments. \*\* $p < 0.01$  and \*\*\* $p < 0.001$  compared to non-treated.

**Table S1. Antibody used for western blot analysis**

| Name             | Company   | Source | Molecular Weight(kDa) | Dilution for WB |
|------------------|-----------|--------|-----------------------|-----------------|
| $\beta$ -actin   | sc-47778  | Mouse  | 45                    | 1:3000          |
| I- $\kappa$ B    | 4812S     | Rabbit | 39                    | 1:1000          |
| p- I- $\kappa$ B | 2859S     | Rabbit | 39                    | 1:1000          |
| NF- $\kappa$ B   | 8242S     | Rabbit | 65                    | 1:1000          |
| COX-2            | sc-376861 | Mouse  | 72                    | 1:1000          |
| MMP-9            | sc-13520  | Mouse  | 92                    | 1:1000          |
| ERK              | 4695S     | Rabbit | 42                    | 1:1000          |
| p-ERK            | 4370S     | Rabbit | 42                    | 1:1000          |
| JNK              | 9252S     | Rabbit | 48                    | 1:1000          |
| p-JNK            | 4668S     | Rabbit | 48                    | 1:1000          |
| p38              | 9212s     | Rabbit | 40                    | 1:1000          |
| p-p38            | 4511S     | Rabbit | 40                    | 1:1000          |

**Table S2. PCR primers used for quantitative real-time PCR**

| Gene             |         | Sequence (5'~3')          | Annealing<br>Temperature(°C) |
|------------------|---------|---------------------------|------------------------------|
| MMP-9<br>(Human) | Forward | GCTGCCTGTCGGTGAGAT<br>TGG | 65.3                         |
| MMP-9<br>(Human) | Reverse | TGGTCCTGGTGCTCCTGG<br>TG  | 64.6                         |
| GAPDH<br>(Human) | Forward | AGCCTTCTCCATGGTCGT<br>GA  | 60.5                         |
| GAPDH<br>(Human) | Reverse | CGGAGTCAACGGATTGG<br>TC   | 60.5                         |
